# TABLE OF CONTENTS

# ANESTHESIOLOGY

Volume 135  
Issue 3  
September 2021

◇ **This Month in ANESTHESIOLOGY** .....A1  
**Science, Medicine, and the Anesthesiologist**.....A13  
**Infographics in Anesthesiology** .....A17

◆ **Editorial**

**Scientific Integrity and Misconduct—Yet Again**  
*E. D. Kharasch* .....377

**Could Trended Oxygen Partial Pressure in the Urine Be the “ST Segment” Kidney Monitor We’ve Been Looking For?**  
*M. Stafford-Smith* .....380

**Does Divergence Exist between Animal and Human Data on the Effect of Cebranopadol?**  
*A. Dahan, E. Olofson* .....382

**Special Article**

**Back Pain in Outer Space**  
*R. Penchev, R. A. Scheuring, A. T. Soto, D. M. Miletich, E. Kerstman, S. P. Cohen* .....384

Space flight is anticipated to increase, both among astronauts and tourists. A majority of space travelers will experience back pain, with most cases being self-limited. This review discusses the epidemiology, pathophysiology, and preventative measures of space travel on back pain.

**Readers’ Toolbox**

**Statistical Development and Validation of Clinical Prediction Models**  
*S. J. Staffa, D. Zurakowski* .....396

This article aims to educate anesthesiologists on key statistical concepts regarding validation of multivariable prediction models for binary outcomes, which is essential for assuring generalizability and reproducibility of the published clinical tool.

**Perioperative Medicine**

**CLINICAL SCIENCE**

◆ ◆ **Noninvasive Urine Oxygen Monitoring and the Risk of Acute Kidney Injury in Cardiac Surgery**  
 *N. A. Silverton, L. R. Lofgren, I. E. Hall, G. J. Stoddard, N. P. Melendez, M. Van Tienderen, S. Shumway, B. J. Stringer, W.-s. Kang, C. Lybbert, K. Kuck*.....406

This prospective single-center observational pilot study measured urinary oxygen partial pressure and urine flow in 91 patients undergoing cardiac surgery using a novel device placed between the urinary catheter and collecting bag. Urinary oxygen partial pressure was successfully measured in 86 of these patients. Mean urinary oxygen partial pressure in the period after cardiopulmonary bypass was significantly lower in patients who subsequently developed acute kidney injury than in those who did not. Future studies are needed to validate these findings at other centers.

◆ ◆ **Epidural Anesthesia–Analgesia and Recurrence-free Survival after Lung Cancer Surgery: A Randomized Trial**  
 *Z.-Z. Xu, H.-J. Li, M.-H. Li, S.-M. Huang, X. Li, Q.-H. Liu, J. Li, X.-Y. Li, D.-X. Wang, D. I. Sessler*.....419

In a randomized trial of adults scheduled for video-assisted thoracoscopic lung cancer resection comparing combined epidural–general to general anesthesia, there was no difference between groups in recurrence-free survival time. There was also no difference in overall survival. *SUPPLEMENTAL DIGITAL CONTENT IS AVAILABLE IN THE TEXT*

◇ Refers to This Month in ANESTHESIOLOGY

◆ Refers to Editorial

 This article has an Audio Podcast

 See Supplemental Digital Content

 CME Article

 This article has a Video Abstract

 Part of the Lethon writing competition

 This article has a Visual Abstract

 OPEN This article is Open Access

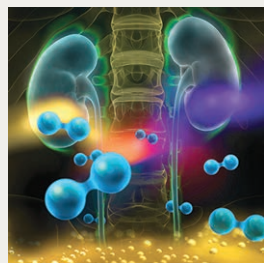

**ON THE COVER:** Acute kidney injury (AKI) is a common complication of cardiac surgery. An intraoperative monitor of kidney perfusion is needed to identify patients at risk for AKI. In this issue of ANESTHESIOLOGY, Silverton *et al.* tested the value of a prototype device that measures urinary oxygen concentration and instantaneous urine flow in predicting AKI. In an accompanying editorial, Stafford-Smith discusses the limitations of current monitors and the potential value of urine oxygen monitoring for predicting AKI. Cover Illustration: A. Johnson, Vivo Visuals.

- Silverton *et al.*: Noninvasive Urine Oxygen Monitoring and the Risk of Acute Kidney Injury in Cardiac Surgery, p. 406
- Stafford-Smith: Could Trended Oxygen Partial Pressure in the Urine Be the “ST Segment” Kidney Monitor We’ve Been Looking For? p. 380

◇ **Anterior Quadratus Lumborum Block Does Not Provide Superior Pain Control after Hip Arthroscopy: A Double-blinded Randomized Controlled Trial**

S. C. Haskins, A. Tseng, H. Zhong, M. Mamic, S. I. Cheng, J. A. Nejm, D. S. Wetmore, S. H. Coleman, A. S. Ranawat, D. H. Nawabi, B. T. Kelly, S. G. Memtsoudis.....433

Anterior quadratus lumborum block along with acetaminophen and ketorolac did not improve postoperative analgesia in comparison to acetaminophen and ketorolac alone. Likewise, secondary outcomes including opioid consumption and patient satisfaction were not improved in subjects receiving quadratus lumborum blocks.

◇ **Pectoral Nerve Blocks for Breast Augmentation Surgery: A Randomized, Double-blind, Dual-centered Controlled Trial**

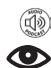

Y. Aarab, S. Ramin, T. Odonnat, O. Garnier, A. Boissin, N. Molinari, G. Marin, P.-F. Perrigault, P. Cuvillon, G. Chanques .....442

Patients undergoing breast augmentation who received pectoral nerve blocks in addition to multimodal analgesia experienced less pain in the first 6 h postoperatively and lower maximal pain scores between postoperative days 1 and 5. The use of pectoral nerve blocks also reduced opioid consumption up to 5 days after surgery.

◇ **Peripheral Nerve Blocks and Potentially Attributable Adverse Events in Older People with Hip Fracture: A Retrospective Population-based Cohort Study**

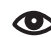

N. Melton, R. Talarico, F. Abdallah, P. E. Beaulé, S. Boet, A. J. Forster, S. M. Fernando, A. Huang, C. J. L. McCartney, B. Meulenkamp, J. Perry, B. Power, R. Ramlogan, M. Taljaard, P. Tanuseputro, C. van Walraven, D. N. Wijeyesundera, D. I. Mclsaac.....454

Among 91,563 surgical and nonsurgical hip fracture patients in Ontario between 2009 and 2017, 17.1% (15,631) received a peripheral nerve block. Administrative data demonstrate that 5.8% (5,321 of 91,563) of hip fracture patients experienced a nerve block-attributable adverse event (seizures, fall-related injuries, cardiac arrest, or nerve injury). Receipt of a nerve block was not associated with a higher rate of these adverse events (5.5% among patients receiving a block vs. 5.9% of patients without a block). *SUPPLEMENTAL DIGITAL CONTENT IS AVAILABLE IN THE TEXT*

**BASIC SCIENCE**

◆ **GABAergic Neurons in the Dorsal–Intermediate Lateral Septum Regulate Sleep–Wakefulness and Anesthesia in Mice**

D. Wang, Q. Guo, Y. Zhou, Z. Xu, S.-W. Hu, X.-X. Kong, Y.-M. Yu, J.-X. Yang, H. Zhang, H.-L. Ding, J.-L. Cao .....463

A combination of genetic and electrophysiologic techniques in male mice revealed that  $\gamma$ -aminobutyric acid–mediated neurons of the lateral septum are highly active during the awake state. Genetic activation of  $\gamma$ -aminobutyric acid–mediated neurons in the lateral septum promotes recovery from isoflurane anesthesia through the projection of these cells to the ventral tegmental area. These observations suggest a role for  $\gamma$ -aminobutyric acid–mediated neurons in the lateral septum to maintain wakefulness and to promote recovery from isoflurane anesthesia.

*SUPPLEMENTAL DIGITAL CONTENT IS AVAILABLE IN THE TEXT*

**Pain Medicine**

**BASIC SCIENCE**

◆ **Functional Profile of Systemic and Intrathecal Cebranopadol in Nonhuman Primates**

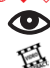

H. Ding, C. Trapella, N. Kiguchi, F.-C. Hsu, G. Caló, M.-C. Ko.....482

In rhesus monkeys, it was observed that the analgesic activity of cebranopadol is mediated primarily through the  $\mu$ -opioid receptor. While cebranopadol caused less scratching behavior and respiratory depression than morphine and fentanyl, it evinced clear reinforcing effects. *SUPPLEMENTAL DIGITAL CONTENT IS AVAILABLE IN THE TEXT*

**Education**

**IMAGES IN ANESTHESIOLOGY**

**Inadvertent Ligation of the Descending Aorta during Removal of a Pulmonary Sequestration**

D. Liu, D. Sugiyama, K. Ueda, O. Kobayashi.....494

**Dramatic Cervical Spine Injury Secondary to Videolaryngoscopy in a Patient Suffering from Ankylosing Spondylitis**

A. Epaud, E. Levesque, S. Clariot.....495

**CLINICAL FOCUS REVIEW**

**Management of Extracorporeal Membrane Oxygenation for Postcardiotomy Cardiogenic Shock**

B. Patel, J. L. Diaz-Gomez, R. K. Ghanta, A. W. Bracey, S. Chatterjee ..... 497

Patients with postcardiotomy cardiogenic shock refractory to conventional support can be successfully supported with extracorporeal membrane oxygenation. Management considerations are discussed to aid clinicians caring for these patients.

◇ **Point-of-care Ultrasound in Cardiac Arrest**  
*J. A. Paul, O. P. F. Panzer* .....508

This review explains the role of point-of-care ultrasound in cardiac arrest rhythm classification and the diagnosis of reversible causes, discusses available protocols for the application of ultrasound to Advanced Cardiac Life Support, and summarizes principles for its safe implementation.

 **Anemia: Perioperative Risk and Treatment Opportunity**  
*G. M. T. Hare, C. D. Mazer* .....520

Anemia is associated with adverse outcomes in perioperative patients. Understanding the adaptive cellular and physiologic responses may help define the associated mechanisms and support utilization of effective patient blood management treatment strategies to improve patient outcomes. *SUPPLEMENTAL DIGITAL CONTENT IS AVAILABLE IN THE TEXT*

◇ **Rethinking Patient Surveillance on Hospital Wards**  
*F. Michard, C. J. Kalkman* .....531

Continuous and mobile monitoring of vital signs may soon become a reality on hospital wards. By enabling the early detection of clinical deterioration, it may improve quality of care and patient safety.

## MIND TO MIND

**My Neatest Handwriting**  
*J. A. Guzzi* .....541

**Transplant Time**  
*L. Buletti* .....544

## CORRESPONDENCE

**Acute Postoperative Pain Trajectory Groups: Comment**  
*H. Kehlet, N. B. Foss* .....547

**Acute Postoperative Pain Trajectory Groups: Reply**  
*T. Vasilopoulos, P. J. Tighe* .....547

**A Crack in the Wall, or How Artificial Intelligence Would Classify Pink Floyd?**  
*M. Perouansky, J. W. Sleight* .....548

## Anesthesiology Reflections from the Wood Library-Museum

**Tilting Tables: George Pitkin's Gravity-defying Spinal Anesthetic**  
*Jane S. Moon and Melissa L. Coleman* .....453

**The Heidbrink Anesthetizers: Model A to Z?**  
*Melissa L. Coleman and Jane S. Moon* .....493

**The Circle of Life: Christopher Wren and the First Intravenous Anesthetic**  
*Jane S. Moon and Melissa L. Coleman* .....530

**Vapo-Cresolene: A Dangerous Beauty Redeemed**  
*Melissa L. Coleman and Jane S. Moon* .....540

**Careers & Events** ..... **A19**

## INSTRUCTIONS FOR AUTHORS

The most recently updated version of the Instructions for Authors is available at [www.anesthesiology.org](http://www.anesthesiology.org). Please refer to the Instructions for the preparation of any material for submission to ANESTHESIOLOGY.

Manuscripts submitted for consideration for publication must be submitted in electronic format via Editorial Manager (<https://www.editorialmanager.com/aln>). Detailed directions for submission and the most recent version of the Instructions for Authors can be found on the Journal's Web site (<http://www.anesthesiology.org>). Books and educational materials for review should be sent to Alan Jay Schwartz, M.D., M.S.Ed., Director of Education, Department of Anesthesiology and Critical Care Medicine, The Children's Hospital of Philadelphia,

34th Street and Civic Center Blvd., Room 9327, Philadelphia, Pennsylvania 19104-4399. Article-specific permission requests are managed with Copyright Clearance Center's Rightslink service. Information can be accessed directly from articles on the journal Web site. More information is available at <http://anesthesiology.pubs.asahq.org/public/rightsandpermissions.aspx>. For questions about the Rightslink service, e-mail [customercare@copyright.com](mailto:customercare@copyright.com) or call 877-622-5543 (U.S. only) or 978-777-9929. Advertising and related correspondence should be addressed to Advertising Manager, Anesthesiology, Wolters Kluwer Health, Inc., Two Commerce Square, 2001 Market Street, Philadelphia, Pennsylvania 19103 (Web site: <http://www.wkcenter.com/>). Publication of an advertisement in Anesthesiology does not constitute endorsement by the Society or Wolters Kluwer Health, Inc. of the product or service described therein or of any representations made by the advertiser with respect to the product or service.

**ANESTHESIOLOGY** (ISSN 0003-3022) is published monthly by Wolters Kluwer Health, Inc., 1800 Dual Highway, Suite 201, Hagerstown, MD 21740-6636. Business office: Two Commerce Square, 2001 Market Street, Philadelphia, PA 19103. Periodicals postage paid at Hagerstown, MD, and at additional mailing offices. Copyright © 2021, the American Society of Anesthesiologists. All Rights Reserved.

**Annual Subscription Rates:** *United States*—\$1077 Individual, \$2671 Institution, \$434 In-training. *Rest of World*—\$1136 Individual, \$2965 Institution, \$434 In-training. Single copy rate \$266. Subscriptions outside of North America must add \$58 for airfreight delivery. Add state sales tax, where applicable. The GST tax of 7% must be added to all orders shipped to Canada (Wolters Kluwer Health, Inc.'s GST Identification #895524239, Publications Mail Agreement #1119672). Indicate in-training status and name of institution. Institution rates apply to libraries, hospitals, corporations, and partnerships of three or more individuals. Subscription prices outside the United States must be prepaid. Prices subject to change without notice. Subscriptions will begin with currently available issue unless otherwise requested. Visit us online at [www.lww.com](http://www.lww.com).

Individual and in-training subscription rates include print and access to the online version. Online-only subscriptions for individuals (\$356) and persons in training (\$356) are available to nonmembers and may be ordered by downloading a copy of the Online Subscription FAXback Form from the Web site, completing the information requested, and faxing the completed form to 301-223-2400. Institutional rates are for print only; online subscriptions are available via Ovid. Institutions can choose to purchase a print and online subscription together for a discounted rate. Institutions that wish to purchase a print subscription, please contact Wolters Kluwer Health,

Inc., 1800 Dual Highway, Suite 201, Hagerstown, MD 21740-6636; phone: 800-638-3030; fax: 301-223-2400. Institutions that wish to purchase an online subscription or online with print, please contact the Ovid Regional Sales Office near you or visit [www.ovid.com/site/index.jsp](http://www.ovid.com/site/index.jsp) and select Contact and Locations.

**Address for non-member subscription information, orders, or change of address:** Wolters Kluwer Health, Inc., 1800 Dual Highway, Suite 201, Hagerstown, MD 21740-6636; phone: 800-638-3030; fax: 301-223-2400.

**Address for member subscription information, orders, or change of address:** Members of the American Society of Anesthesiologists receive the print and online journal with their membership. To become a member or provide a change of address, please contact the American Society of Anesthesiologists, 1061 American Lane, Schaumburg, Illinois 60173-4973; phone: 847-825-5586; fax: 847-825-1692; e-mail: [membership@ASAhq.org](mailto:membership@ASAhq.org). For all other membership inquiries, contact Wolters Kluwer Health, Inc., Customer Service Department, P.O. Box 1610, Hagerstown, MD 21740; phone: 800-638-3030; fax: 301-223-2400.

**Postmaster:** Send address changes to Anesthesiology, P.O. BOX 1610, Hagerstown, MD 21740.

**Advertising:** Please contact Hilary Druker, National Account Manager, Health Learning, Research & Practice, Medical Journals, Wolters Kluwer Health, Inc.; phone: 609-304-9187; e-mail: [Hilary.Druker@wolterskluwer.com](mailto:Hilary.Druker@wolterskluwer.com). For classified advertising: Dave Wiegand, Recruitment Advertising Representative, Wolters Kluwer Health, Inc.; phone: 847-361-6128; e-mail: [Dave.Wiegand@wolterskluwer.com](mailto:Dave.Wiegand@wolterskluwer.com).
